# Supplementary material for: Network meta‐analysis including treatment by covariate interactions: Consistency can vary across covariate values
Source: PubMed Central journal article supplement (PMC5724666; doi:10.1002/jrsm.1257), 2017-08-23
Supplement: JRSM-8-485-s001.pdf [file JRSM-8-485-s001.pdf]

## Supporting materials

### Supplementary models

Details of the individual patient data network meta-analysis models including treatment by covariate interactions that were applied are given below.

### Notation

Let  $i$  denote the trial where  $i = 1, \dots, NS$  and  $NS$  is the number of independent trials; let  $j$  the patient where  $j = 1, \dots, NP_i$  such that  $NP_i$  is the number of patients in trial  $i$ ; and let  $k$  be the trial arm where  $k = 1, \dots, NA_i$  and  $NA_i$  is the number of arms in trial  $i$ .

Suppose  $y_{ijk} = 1$  if patient  $j$  in trial  $i$  in arm  $k$  experiences the event and  $y_{ijk} = 0$  if patient  $j$  in trial  $i$  in arm  $k$  does not experience the event. Assume that the outcomes of patients,  $y_{ijk}$ , are independent and distributed as  $y_{ijk} \sim \text{bernoulli}(p_{ijk})$  where  $p_{ijk}$  is the probability of an event for patient  $j$  in trial  $i$  in arm  $k$ . Let  $x_{ijk}$  be a patient-level covariate for patient  $j$  in trial  $i$  in arm  $k$  (such as, a continuous covariate value or an indicator variable for a dichotomous covariate).

Let  $t_{ik}$  denote the treatment given in trial  $i$  in arm  $k$  where  $t_{ik} \in \{1, \dots, NT\}$  and  $NT$  is the number of treatments in the network. Also specify that the node being split is  $(\hat{t}, t^*)$  where  $\hat{t} \neq t^*$  and  $\hat{t} < t^*$ . For example, if one wants to split the node  $(3, 4)$  then  $\hat{t} = 3$  and  $t^* = 4$ .

### Model S1. NMA model including treatment by covariate interaction

Assuming no multi-arm trials exist, the random-effects model is given as follows:

$$\text{logit}(p_{jik}) = \begin{cases} \mu_i + \beta_{0i}x_{jik} & \text{if } k = 1 \\ \mu_i + \beta_{0i}x_{jik} + \delta_{i,1k} + \beta_{t_{i1},t_{ik}}x_{jik} & \text{if } k \neq 1 \end{cases}$$

where  $\mu_i$  is the log odds of an event in arm 1 of trial  $i$ ;  $\beta_{0i}$  is a study-specific regression parameter that represents the difference in the log odds of an event in arm 1 of trial  $i$  per unit increase in the covariate  $x_{ijk}$ ;  $\beta_{t_{i1},t_{ik}}$  represents the difference in the log odds ratio of  $t_{ik}$  vs.  $t_{i1}$  per unit increase in the covariate and  $\beta_{t_{i1},t_{ik}} = \beta_{1,t_{ik}} - \beta_{1,t_{i1}}$ ; and  $\delta_{i,1k}$  represents the trial-specific log odds ratio of  $t_{ik}$  vs.  $t_{i1}$ . The trial-specific log odds ratios,  $\delta_{i,1k}$  are assumed to be realisations from a normal distribution where

$$\delta_{i,1k} \sim N(d_{t_{i1},t_{ik}}, \sigma^2)$$

and

$$d_{t_{i1},t_{ik}} = d_{1,t_{ik}} - d_{1,t_{i1}}$$

In this model,  $d_{t_{i1},t_{ik}}$  represents the log odds ratio of  $t_{ik}$  vs.  $t_{i1}$ . The fixed-effect model is given by setting  $\sigma^2 = 0$ .

Under a Bayesian framework, prior distributions are specified for  $\mu_i$ ,  $\beta_{0i}$ ,  $d_{1,t_{ik}}$ ,  $\beta_{1,t_{ik}}$  and  $\sigma^2$ .

The model can also be applied to datasets with multi-arm trials but the correlation between trial-specific treatment effects must be taken into account. For each multi-arm trial  $i$  with  $m$

arms, the trial-specific treatment effects are taken to be a realisation from a multivariate normal distribution

$$\begin{pmatrix} \delta_{i,12} \\ \vdots \\ \delta_{i,1m} \end{pmatrix} \sim N \left( \begin{pmatrix} d_{1,t_{i2}} - d_{1,t_{i1}} \\ \vdots \\ d_{1,t_{im}} - d_{1,t_{i1}} \end{pmatrix}, \begin{pmatrix} \tau^2 & \dots & \tau^2/2 \\ \vdots & \ddots & \vdots \\ \tau^2/2 & \dots & \tau^2 \end{pmatrix} \right)$$

that can be decomposed into a series of conditional univariate normal distributions.

### **Model S2. NMA node-splitting model including treatment by covariate interaction**

When there are no multi-arm trials, the random-effects model is specified as follows:

$$\text{logit}(p_{ijk}) = \begin{cases} \mu_i + \beta_{0i}x_{ijk} & \text{if } k = 1 \\ \mu_i + \beta_{0i}x_{ijk} + \delta_{i,1k} + \beta_{t_{i1},t_{ik}}x_{ijk} & \text{if } k \neq 1 \text{ and } t_{i1} \neq \hat{t} \text{ and/or } t_{ik} \neq t^* \\ \mu_i + \beta_{0i}x_{ijk} + \delta_{i,1k} + \beta^{dir}x_{ijk} & \text{if } k \neq 1 \text{ and } t_{i1} = \hat{t} \text{ and } t_{ik} = t^* \end{cases}$$

and where  $\beta^{dir}$  represents the difference in the log odds ratio of  $t^*$  vs.  $\hat{t}$  per unit increase in the covariate estimated using direct evidence;  $\beta_{t_{i1},t_{ik}}$  represents the difference in the log odds ratio of  $t_{ik}$  vs.  $t_{i1}$  per unit increase in the covariate estimated using all trials that did not allocate  $t^*$  and  $\hat{t}$  (i.e. using indirect evidence); and  $\delta_{i,1k}$  represents the trial-specific log odds ratio of  $t_{ik}$  vs.  $t_{i1}$ . The trial-specific log odds ratios,  $\delta_{i,1k}$  are assumed to be realisations from a normal distribution where

$$\delta_{i,1k} \sim N(d^{dir}, \sigma^2)$$

if trial  $i$  allocated  $t^*$  and  $\hat{t}$ , that is,  $t_{i1} = \hat{t}$  and  $t_{ik} = t^*$ ; whereas

$$\delta_{i,1k} \sim N(d_{t_{i1}, t_{ik}}, \sigma^2)$$

and the treatment effects satisfy the consistency equation  $d_{t_{i1}, t_{ik}} = d_{1, t_{ik}} - d_{1, t_{i1}}$  if trial  $i$  did not allocate  $t^*$  and  $\hat{t}$ , that is,  $t_{i1} \neq \hat{t}$  and/or  $t_{ik} \neq t^*$ .

In this model  $d_{t_{i1}, t_{ik}}$  represents the mean log odds ratio of  $t_{ik}$  vs.  $t_{i1}$  when the covariate value is zero estimated using all studies that did not allocate  $t^*$  and  $\hat{t}$  (i.e. using indirect evidence); and  $d^{dir}$  represents the mean log odds ratio of  $t^*$  vs.  $\hat{t}$  when the covariate value is zero estimated using direct evidence.

Under a Bayesian framework, prior distributions are specified for  $\mu_i, \beta_{0i}, d_{1, t_{ik}}, \beta_{1, t_{ik}}, d^{dir}, \beta^{dir}$  and  $\sigma^2$ .

Multiple node-splitting models are usually applied. One model can be applied for each comparison providing both direct and indirect evidence are available for that comparison.

Node-splitting models can accommodate multi-arm trials as described elsewhere (Dias et al., 2010a, van Valkenhoef et al., 2016). If one wants to split node  $(t_{i1}, t_{ik})$  then a multi-arm trial  $i$  will contribute direct evidence to the treatment effect ( $d^{dir}$ ) because  $\hat{t} = t_{i1}$ . However, if one splits another node (e.g.  $(t_{i2}, t_{i3})$ ) then  $\hat{t} \neq t_{i1}$  therefore, the multi-arm trial would not contribute direct evidence to the estimation of the treatment effect ( $d^{dir}$ ), therefore, to overcome this problem and to utilise all the direct evidence, if the multi-arm trial compared the two treatments  $t^*$  and  $\hat{t}$ , in addition to other treatments, treatment  $\hat{t}$  is taken to be the

baseline treatment  $t_{i1}$  for that study. For example, if a trial  $i$  compared treatments 1, 3 and 4,

and one wants to split node (1, 3) then  $\hat{t} = t_{i1} = 1$  and the model would be as follows:

$$\text{logit}(p_{ij1}) = \mu_i + \beta_{0i}x_{ij1} \text{ for treatment 1,}$$

$$\text{logit}(p_{ij2}) = \mu_i + \beta_{0i}x_{ij2} + \delta_{i,12} + \beta^{dir}x_{ij2} \text{ for treatment 3 where } \delta_{i,12} \sim N(d^{dir}, \tau^2),$$

and

$$\text{logit}(p_{ij3}) = \mu_i + \beta_{0i}x_{ij3} + \delta_{i,13} + \beta_{1,4}x_{ij3} \text{ for treatment 4 where } \delta_{i,13} \sim N(d_{1,4}, \tau^2).$$

Whereas, for the same trial, if one wants to split node (3, 4) instead, then we fix  $\hat{t} = t_{i1} = 3$  and the model is

$$\text{logit}(p_{ij2}) = \mu_i + \beta_{0i}x_{ij2} + \delta_{i,12} + \beta_{3,1}x_{ij2} \text{ for treatment 1 where } \delta_{i,12} \sim N(d_{3,1}, \tau^2).$$

$$\text{logit}(p_{ij1}) = \mu_i + \beta_{0i}x_{ij1} \text{ for treatment 3, and}$$

$$\text{logit}(p_{ij3}) = \mu_i + \beta_{0i}x_{ij3} + \delta_{i,13} + \beta^{dir}x_{ij3} \text{ for treatment 4 where } \delta_{i,13} \sim N(d^{dir}, \tau^2).$$

## Code for Model S1

Winbugs code (saved as winbugs file "NMA RE IPD COVM1.odc")

```
model{
for(i in 1:ns){
  w[i,1] <- 0 #LOOP FOR EACH TRIAL
  #W IS ZERO FOR ARM 1 OF EACH TRIAL
  delta[i,1] <- 0 #TREATMENT EFFECT IS ZERO FOR ARM 1 OF EACH TRIAL
  mu[i] ~ dnorm(0,0.00001) #PRIOR DISTRIBUTION FOR MU
  beta0[i] ~ dnorm(0,0.00001) #PRIOR DISTRIBUTION FOR BETA0
  for (k in 2:na[i]) { #LOOP FOR EACH ARM
    delta[i,k] ~ dnorm(md[i,k], taud[i,k]) #DISTRIBUTION OF TRIAL-SPECIFIC TREATMENT EFFECTS
    md[i,k] <- d[t[i,k]] - d[t[i,1]] + sw[i,k] #MEAN OF DISTRIBUTION (CORRECTED FOR MULTI-ARM
    TRIALS)
    taud[i,k] <- tau *2*(k-1)/k #PRECISION OF DISTRIBUTION (CORRECTED FOR MULTI-ARM
    TRIALS)
    w[i,k] <- (delta[i,k] - d[t[i,k]] + d[t[i,1]]) #ADJUSTMENTS FOR MULTI-ARM TRIALS
    sw[i,k] <- sum(w[i,1:k-1])/(k-1) #ADJUSTMENTS FOR MULTI-ARM TRIALS
  }
}
for(l in 1:np) { #LOOP FOR EACH PATIENT
  y[l]~dbern(p[l]) #BERNOULLI LIKELIHOOD
  logit(p[l])<-mu[s[l]] + (beta0[s[l]]*(x[l]-mx)) + delta[s[l],arm[l]] + (beta[tipd[l]]-beta[b[l]]) * (x[l]-mx)
  #LINEAR PREDICTOR
  rhat[l] <- p[l] #MODEL PREDICTION
  dev[l] <- 2*(y[l] * (log(y[l]/rhat[l])) + (1-y[l]) * (log((1-y[l])/(1-rhat[l]))) #DEVIANCE
}

totresdev <- sum(dev[]) #TOTAL RESIDUAL DEVIANCE

d[1]<-0 #LOG ODDS RATIO IS ZERO FOR REFERENT TREATMENT
beta[1] <- 0 #COEFFICIENT IS ZERO FOR REFERENT TREATMENT

sd ~ dunif(0,10) #PRIOR DISTRIBUTION FOR BETWEEN TRIAL STANDARD
DEVIATION
tau <- pow(sd,-2) #BETWEEN TRIAL PRECISION
tausq <- sd*sd #BETWEEN TRIAL VARIANCE

for (k in 2:nt){
  d[k] ~ dnorm(0,0.00001) #PRIOR DISTRIBUTIONS
  beta[k]~dnorm(0,0.00001)
}

for (k in 1:nt){ #CALCULATE THE LOG ODDS RATIO FOR BASIC
  PARAMETERS AT EACH COVARIATE VALUE
  for (j in 1:nz) {
    dz[j,k] <- d[k] - (beta[k])*(mx-z[j]) }
  }

for (c in 1:(nt-1)){ #CALCULATE, FOR EACH COMPARISON, THE
  COEFFICIENT, ODDS RATIO AND LOG ODDS RATIO AT
  MEAN COVARIATE VALUE.
  for (k in (c+1):nt) {
    betas[c,k] <- beta[k] - beta[c]
    or[c,k] <- exp(d[k] - d[c])
    lor[c,k] <- (d[k]-d[c])
    for (j in 1:nz) {
      orz[j,c,k] <- exp(dz[j,k] - dz[j,c])
      lorz[j,c,k] <- (dz[j,k]-dz[j,c])
    }
  }
}
}
```

**Dataset 1 (saved a csv file "utf\_ipdacc.csv")**

#t1= treatment in arm 1, t2=treatment in arm 2, t3=treatment in arm 3.

#na=number of arms

#Note that each row represents one study and the studies are in the same order as in dataset 2.

| t1 | t2 | t3 | na |
|----|----|----|----|
| 1  | 2  | NA | 2  |
| 1  | 2  | NA | 2  |
| 1  | 2  | 3  | 3  |
| 1  | 2  | 3  | 3  |
| 1  | 2  | 3  | 3  |
| 1  | 2  | 3  | 3  |
| 1  | 2  | 3  | 3  |
| 1  | 2  | 4  | 3  |
| 1  | 2  | 4  | 3  |
| 1  | 3  | NA | 2  |
| 1  | 3  | NA | 2  |
| 1  | 3  | NA | 2  |
| 1  | 3  | NA | 2  |
| 1  | 3  | 4  | 3  |
| 1  | 3  | 4  | 3  |
| 1  | 3  | 4  | 3  |
| 1  | 3  | 4  | 3  |

**Dataset 2 (saved as csv file "utf\_ipdacc2.csv")**

(one row per patient)

#age=covariate

#y=binary IPD outcome

#tipd=treatment

#s=study

#b=baseline treatment in that study

#arm=study arm (i.e. 1, 2, 3)

#note that arm 1 of each study is the baseline treatment for that study.

| age | y | tipd | s | b | arm |
|-----|---|------|---|---|-----|
| 21  | 1 | 1    | 1 | 1 | 1   |
| 29  | 1 | 1    | 1 | 1 | 1   |
| .   | . | .    | . | . | .   |
| .   | . | .    | . | . | .   |

**R code**

#INSTALL R PACKAGES

library(R2WinBUGS)

library(coda)

#CHOOSE WORKING DIRECTORY

working.directory="c:\\dir"

setwd(working.directory)

#IMPORT DATA

dat1 = read.csv("utf\_ipdacc.csv")

dat2 = read.csv("utf\_ipdacc2.csv")

#DEFINE VARIABLES THAT NEED TO BE ENTERED INTO THE WINBUGS MODEL

na=dat1\$na #NUMBER OF ARMS IN EACH STUDY

t=cbind(dat1\$t1,dat1\$t2,dat1\$t3, deparse.level = 0) #TREATMENT NUMBER

s=dat2\$s #STUDY NUMBER

y=dat2\$y #OUTCOME

arm=dat2\$arm #STUDYARM

x=dat2\$age/12 #COVARIATE VALUES

b=dat2\$b #BASELINE TREATMENT

tipd=dat2\$tipd #TREATMENT (IPD VERSION)

mx=mean(x) #AVERAGE COVARIATE VALUE

z=c(1,2,3,4,5, mx,0) #CHOSEN COVARIATE VALUES AT WHICH TREATMENT

EFFECTS ARE REQUIRED TO BE ESTIMATED

nz=length(z) #NUMBER OF CHOSEN COVARIATE VALUES

```

ns=max(s)                                #NUMBER OF TRIALS
nt=max(tipd)                              #NUMBER OF TREATMENTS
np=length(y)                              #NUMBER OF PATIENTS

#LIST DATA FOR ENTRY INTO WINBUGS
data= list("y", "s", "arm", "tipd", "b", "x", "z", "mx", "t", "na", "ns", "nt", "np", "nz")

#DEFINE INITIAL VALUES FOR ENTRY INTO WINBUGS
inits1 = list(d=c(NA,0,0,0), sd=1, mu=c(0,0,0,0,0, 0,0,0,0,0, 0,0,0,0,0, 0,0), beta0=c(0,0,0,0,0, 0,0,0,0,0, 0,0,0,0,0, 0,0),
beta=c(NA,0,0,0))

#WINBUGS MODEL
Models1 = bugs (data, inits1, model.file= "NMA RE IPD COVM1.odc",
parameters.to.save= c("mu", "d", "totresdev", "or", "lor", "sd", "tausq", "dz", "betas", "beta", "orz", "lorz", "beta0"),
n.chains=1, n.iter=300000, n.burnin=100000, n.thin=5, codaPkg=FALSE, bugs.directory="c:/Program Files/WinBUGS14/",
working.directory=working.directory)

```



## Code for model S2

Winbugs code (saved as winbugs file "NMA RE IPD DSPLIT BETASPLIT.odc")

```
model{
for(i in 1:ns){
  w[i,1] <- 0 #LOOP FOR EACH TRIAL
  j[i,1] <- 0 #W IS ZERO FOR ARM 1 OF EACH TRIAL
  delta[i,bi[i]] <- 0 #J IS ZERO FOR ARM 1 OF EACH TRIAL
  mu[i] ~ dnorm(0,0.00001) #TREATMENT EFFECT IS ZERO FOR ARM 1 OF EACH TRIAL
  beta0[i] ~ dnorm(0,0.00001) #PRIOR DISTRIBUTION FOR MU
  for(k in 1:na[i]) { #PRIOR DISTRIBUTION FOR BETA0
    index[i,k] <- split[i] * (equals(t[i,k], pair[1]) + equals(t[i,k], pair[2])) #LOOP FOR EACH ARM
    #INDICATES IF ARM IS TO BE SPLIT
  }
  for(k in 2:na[i]) {
    delta[i,si[i,k]] ~ dnorm(md[i,si[i,k]],taud[i,si[i,k]]) #DISTRIBUTION OF TRIAL-
    #SPECIFIC TREATMENT EFFECTS
    md[i,si[i,k]] <- (d[si[i,k]] - d[bi[i]] + sw[i,k])*(1-index[i,m[i,k]]) + direct*index[i,m[i,k]]
    #MEAN OF DISTRIBUTION
    #CORRECTED FOR MULTI-ARM
    #TRIALS) SPLIT INTO DIRECT AND
    #INDIRECT
    j[i,k] <- k - (equals(1, split[i]) * step(k-3))
    taud[i,si[i,k]] <- tau *2*(j[i,k]-1)/j[i,k] #PRECISION OF DISTRIBUTION
    #CORRECTED FOR MULTI-ARM
    #TRIALS)
    w[i,k] <- (delta[i,si[i,k]] - d[si[i,k]] + d[bi[i]]) * (1-index[i,k]) #ADJUSTMENTS FOR MULTI-ARM
    #TRIALS
    sw[i,k] <- sum(w[i,1:k-1])/(j[i,k]-1) #ADJUSTMENTS FOR MULTI-ARM
    #TRIALS
  }
}

for(l in 1:np) {
  y[l]~dbern(p[l]) #LOOP FOR EACH PATIENT
  logit(p[l])<-mu[s[l]] + beta0[s[l]]*(x[l]-mx) + delta[s[l], tipd[l]] + (deltab[l]*(1-equals(tipd[l],bi[s[l]])))
  #BERNOULLI LIKELIHOOD
  #LINEAR PREDICTOR
  rhat[l] <- p[l] #MODEL PREDICTION
  dev[l] <- 2*(y[l] * (log(y[l]/rhat[l])) + (1-y[l]) * (log((1-y[l])/(1-rhat[l])))) #DEVIANCE
  index2[l] <- - split[s[l]] * (equals(tipd[l], pair[1]) + equals(tipd[l], pair[2])) #INDICATES IF ARM IS TO BE SPLIT
  deltab[l] <- (beta[tipd[l]] - beta[bi[s[l]]])*(x[l]-mx)*(1-index2[l]) + directbeta*(x[l]-mx)*(index2[l])
  #TREATMENT BY COVARIATE
  #INTERACTION TERM SPLIT INTO
  #DIRECT AND INDIRECT
}

totresdev <- sum(dev[]) #TOTAL RESIDUAL DEVIANCE

direct ~ dnorm(0,0.00001) #PRIOR DISTRIBUTION OF LOG ODDS RATIO FROM
#DIRECT EVIDENCE
directbeta ~ dnorm(0,0.00001) #PRIOR DISTRIBUTION OF COEFFICIENT FROM DIRECT
#EVIDENCE
d[1]<-0 #LOG ODDS RATIO IS ZERO FOR REFERENT TREATMENT
beta[1] <- 0 #COEFFICIENT IS ZERO FOR REFERENT TREATMENT

sd ~ dunif(0,10) #PRIOR DISTRIBUTION FOR BETWEEN TRIAL STANDARD
#DEVIATION
tau <- pow(sd,-2) #BETWEEN TRIAL PRECISION
tausq <- sd*sd #BETWEEN TRIAL VARIANCE

for(k in 2:nt){
  d[k] ~ dnorm(0,0.00001) #PRIOR DISTRIBUTIONS FOR LOG ODDS RATIO AND
  #COEFFICIENT FROM INDIRECT EVIDENCE
  beta[k]~dnorm(0,0.00001)
}

for(k in 1:nt){
  #CALCULATE THE LOG ODDS RATIO FOR BASIC
```

PARAMETERS AT EACH COVARIATE VALUE FOR  
INDIRECT EVIDENCE

```

for (v in 1:nz) { dz[v,k] <- d[k] - (beta[k])*(mx-z[v]) }
}

for (c in 1:(nt-1)){
#CALCULATE, FOR EACH COMPARISON, THE
#COEFFICIENT, ODDS RATIO AND LOG ODDS RATIO AT
#MEAN COVARIATE VALUE FOR INDIRECT EVIDENCE.

for (k in (c+1):nt) {
  betas[c,k] <- beta[k] - beta[c]
  lor[c,k] <- (d[k]-d[c])
  for (v in 1:nz) {

#CALCULATE, FOR EACH COMPARISON, ODDS RATIO AND
#LOG ODDS RATIO AT DIFFERENT COVARIATE VALUES
#FOR INDIRECT EVIDENCE.

    lorz[v,c,k] <- (dz[v,k]-dz[v,c])
  }
}

for (v in 1:nz) {
#LOG ODDS RATIO AND ODDS RATIO AT EACH
#COVARIATE VALUE FOR DIRECT EVIDENCE.

  directz[v] <- direct - (directbeta)*(mx-z[v])
  directorz[v] <-exp(directz[v])
}

for (v in 1:nz) {
  diff[v] <- directz[v] - lorz[v, pair[1], pair[2]]
  prob[v] <- step(diff[v])
}
}

```

**R code**

```

#INSTALL R PACKAGES
library(R2WinBUGS)
library(coda)

```

```

#CHOOSE WORKING DIRECTORY
working.directory="c:\\dir"
setwd(working.directory)

```

```

#LOAD FUNCTIONS TO SHAPE DATA

```

```

#CHECK IF PAIR(X,Y) IN ROW I OF DATA AND GIVE BASELINE FOR DATA ROW I

```

```

PairXY <- function(treat, pair)
{
  N <- nrow(treat)
  out <- cbind(split=rep(0,N), b=rep(0,N))
  for (i in 1:N) {
    pos <- match(pair, treat[i,], nomatch=0) # lenght = length(pair) = 2
    out[i,1] <- ifelse(prod(pos)>0, 1, 0) # 1 if pair in line i, 0 o.w.
    out[i,2] <- ifelse(prod(pos)==0, 1, pos[1])
  }
  out
}

```

```

# GIVES NA-1 INDEXES TO SWEEP NON-BASELINE ARMS ONLY

```

```

NonbaseSweep <- function(index, na)
{
  N <- NROW(na)
  C <- max(na)
  out <- matrix(nrow=N, ncol=C)
  for (i in 1:N) {
    for (k in 2:na[i]) {
      out[i,k] <- k - (index[i,"b"] >= k)
    }
  }
}

```

```

}
}
out
}

# BUILDS MATRIX WITH NON-BASELINE TREATMENTS
Sweeptreat <- function(treat, m)
{
  N <- NROW(treat)
  C <- NCOL(m)
  out <- matrix(nrow=N, ncol=C)
  for (i in 1:N) {
    for (k in 2:C) {
      out[i,k] <- treat[i,m[i,k]]
    }
  }
  out
}

## BUILDS VECTOR WITH BASELINE TREATMENTS
Basetreat <- function(treat, b)
{
  N <- nrow(treat)
  out <- rep(0,N)
  for (i in 1:N) {
    out[i] <- treat[i,b[i]]
  }
  out
}

#IMPORT DATA
dat1 = read.csv("utf_ipdacc.csv")
dat2 = read.csv("utf_ipdacc2.csv")

#DEFINE VARIABLES THAT NEED TO BE ENTERED INTO THE WINBUGS MODEL
na=dat1$na #NUMBER OF ARMS IN EACH STUDY
t=cbind(dat1$t1,dat1$t2,dat1$t3, deparse.level = 0) #TREATMENT NUMBER
s=dat2$s #STUDY NUMBER
y=dat2$y #OUTCOME
tipd=dat2$tipd #TREATMENT NUMBER
x=dat2$age/12 #COVARIATE VALUES
ns=max(s) #NMUBER OF TRIALS
nt=max(tipd) #NUMBER OF TREATMENTS
np=length(y) #NUMBER OF PATIENTS
mx=mean(x) #AVERAGE COVARIATE VALUE
z=c(1,2,3,4,5, mx,0) #CHOSEN COVARIATE VALUES AT WHICH TREATMENT
EFFECTS ARE REQUIRED TO BE ESTIMATED.
nz=length(z) #NUMBER OF CHOSEN COVARIATE VALUES

#DEFINE INITIAL VALUES FOR ENTRY INTO WINBUGS
inits1 = list(direct=0, d=c(NA,0,0,0), mu=rep(0,ns), directbeta=0, beta0=c(0,0,0,0,0, 0,0,0,0,0, 0,0,0,0,0, 0,0),
beta=c(NA,0,0,0), beta=c(NA,0,0,0), sd=1)

#CHOOSE NODE TO SPLIT
pair <- c(2,3)

# CALCULATE SPLIT (=1 IF NODE TO SPLIT IS PRESENT AND 0 OTHERWISE)
checkPair <- PairXY(t, pair)

# BUILD VECTOR BI[I] WITH BASELINE TREATMENT: T[I, B[I]]
bi <- Basetreat(t, checkPair[, "b"])

# INDEXES TO SWEEP NON-BASELINE ARMS ONLY
m <- NonbaseSweep(checkPair, na)

# BUILD MATRIX SI[I,K] WITH NON-BASELINE TREATMENTS: T[I, M[I,K]]
si <- Sweeptreat(t,m)

```

```
#LIST DATA FOR ENTRY INTO WINBUGS
```

```
bugs.data(list("y"=y,"s"=s,"tipd"=tipd,  
             "na" = na, "nt" = nt, "ns" = ns,"np" = np, "t"=t,  
             "split" = checkPair["split"], "m" =m,  
             "bi" = bi, "si" = si, "pair" = pair, "x"=x, "z"=z, "nz"=nz,"mx"=mx ) )
```

```
#WINBUGS MODEL
```

```
modelS2=bugs(data = "data.txt",  
             inits = inits1, parameters.to.save = c("direct", "d", "lor", "mu", "prob","totresdev", "diff", "directbeta", "directz", "lorz",  
             "betas", "dz","beta", "sd", "tausq"), model.file = "NMA RE IPD DSPLIT BETASPLIT.odc",  
             n.chains = 1, n.iter = 300000, n.burnin = 100000, bugs.directory = "C:/Program Files/WinBUGS14/",  
             working.directory=working.directory)
```

```
#####REPEAT FOR OTHER NODES
```

| Site                   | Artemisinin-based combination therapies<br>(number of patients that achieved treatment success/number of patients) |         |         |        | Age in years, mean<br>(standard deviation) |
|------------------------|--------------------------------------------------------------------------------------------------------------------|---------|---------|--------|--------------------------------------------|
|                        | DHAPQ                                                                                                              | AQ+AS   | AL      | CD+A   |                                            |
| Manhica (after CD+A)   | 94/100                                                                                                             | 78/97   | -       | -      | 2.88 (1.30)                                |
| Mbarara (after CD+A)   | 63/65                                                                                                              | 59/70   | -       | -      | 2.43 (1.07)                                |
| Nanoro                 | 187/219                                                                                                            | 199/290 | 115/292 | -      | 2.24 (1.18)                                |
| Gabon                  | 62/63                                                                                                              | 67/76   | 65/70   | -      | 2.83 (1.28)                                |
| Afokang                | 67/72                                                                                                              | 78/83   | 84/87   | -      | 2.94 (1.28)                                |
| Pamol                  | 60/65                                                                                                              | 73/79   | 73/80   | -      | 2.66 (1.36)                                |
| Ndola                  | 67/67                                                                                                              | 63/69   | 63/75   | -      | 2.45 (1.20)                                |
| Manhica (before CD+A)  | 78/82                                                                                                              | 70/86   | -       | 42/84  | 2.82 (1.00)                                |
| Mbarara (before CD+A)  | 72/80                                                                                                              | 64/79   | -       | 53/80  | 2.60 (1.10)                                |
| Rukara (after CD+A)    | 46/47                                                                                                              | -       | 46/50   | -      | 3.08 (0.92)                                |
| Jinja (after CD+A)     | 160/167                                                                                                            | -       | 157/168 | -      | 2.33 (1.17)                                |
| Tororo (after CD+A)    | 54/75                                                                                                              | -       | 33/77   | -      | 1.99 (0.99)                                |
| Mashesha (after CD+A)  | 49/52                                                                                                              | -       | 51/52   | -      | 2.90 (1.05)                                |
| Rukara (before CD+A)   | 22/23                                                                                                              | -       | 18/21   | 4/23   | 2.71 (1.00)                                |
| Jinja (before CD+A)    | 37/39                                                                                                              | -       | 35/38   | 34/40  | 2.62 (1.19)                                |
| Tororo (before CD+A)   | 109/141                                                                                                            | -       | 88/138  | 71/142 | 2.11 (0.85)                                |
| Mashesha (before CD+A) | 23/24                                                                                                              | -       | 23/23   | 18/24  | 2.92 (1.09)                                |

**Table S1. Summary of the individual patient data (i.e. event rate of each treatment group of each site for treatment success at day 28) and covariate information.**

AQ+AS: amodiaquine-artesunate; AL: artemether-lumefantrine; CD+A: chlorproguanil-dapsone plus artesunate; DHAPQ: dihydroartemisinin-piperaquine.

| Comparison     | Evidence type | Odds ratio                                            |                      |                      |                      |                      |                      |
|----------------|---------------|-------------------------------------------------------|----------------------|----------------------|----------------------|----------------------|----------------------|
|                |               | Posterior median (posterior 95% credibility interval) |                      |                      |                      |                      |                      |
|                |               | Age 1                                                 | Age 2                | Mean age<br>i.e. 2.5 | Age 3                | Age 4                | Age 5                |
| AL vs. AQ+AS   | Direct        | 0.65<br>(0.26, 1.76)                                  | 0.71<br>(0.29, 1.81) | 0.74<br>(0.31, 1.87) | 0.77<br>(0.31, 1.96) | 0.83<br>(0.32, 2.26) | 0.90<br>(0.31, 2.72) |
|                | Indirect      | 2.65<br>(0.86, 9.44)                                  | 1.89<br>(0.72, 5.88) | 1.60<br>(0.61, 4.90) | 1.36<br>(0.50, 4.26) | 0.98<br>(0.29, 3.58) | 0.71<br>(0.15, 3.37) |
| CD+A vs. AQ+AS | Direct        | 0.66<br>(0.13, 3.47)                                  | 0.43<br>(0.10, 1.92) | 0.34<br>(0.08, 1.50) | 0.28<br>(0.06, 1.21) | 0.18<br>(0.04, 0.87) | 0.11<br>(0.02, 0.70) |
|                | Indirect      | 0.26<br>(0.06, 1.02)                                  | 0.23<br>(0.06, 0.80) | 0.22<br>(0.06, 0.75) | 0.21<br>(0.06, 0.75) | 0.19<br>(0.04, 0.83) | 0.17<br>(0.03, 1.01) |
| CD+A vs. AL    | Direct        | 0.24<br>(0.06, 0.82)                                  | 0.21<br>(0.06, 0.62) | 0.20<br>(0.06, 0.58) | 0.18<br>(0.05, 0.56) | 0.16<br>(0.04, 0.59) | 0.14<br>(0.03, 0.70) |
|                | Indirect      | 0.69<br>(0.13, 3.25)                                  | 0.43<br>(0.10, 1.68) | 0.34<br>(0.08, 1.30) | 0.26<br>(0.06, 1.04) | 0.16<br>(0.03, 0.75) | 0.10<br>(0.02, 0.62) |

**Table S2. Odds ratios for treatment success from the NMA node-splitting models including interactions (*model S2*).**

AQ+AS: amodiaquine-artesunate; AL: artemether-lumefantrine; CD+A: chlorproguanil-dapsone plus artesunate; DHAPQ: dihydroartemisinin-piperazine.

| Comparison                | Log odds ratio<br>Posterior median (posterior 95% credibility interval) |                         |                         |                       |                       |                       |
|---------------------------|-------------------------------------------------------------------------|-------------------------|-------------------------|-----------------------|-----------------------|-----------------------|
|                           | Age 1                                                                   | Age 2                   | Mean age<br>i.e. 2.5    | Age 3                 | Age 4                 | Age 5                 |
| <b>AL vs. AQ+AS</b>       | 0.05<br>(-0.74, 0.92)                                                   | 0.05<br>(-0.67, 0.87)   | 0.06<br>(-0.67, 0.87)   | 0.06<br>-0.68, 0.88   | 0.07<br>-0.75, 0.94   | 0.08<br>-0.86, 1.05   |
| <b>CD+A vs.<br/>AQ+AS</b> | -0.93<br>(-2.02, 0.11)                                                  | -1.20<br>(-2.18, -0.27) | -1.34<br>(-2.30, -0.42) | -1.47<br>-2.45, -0.54 | -1.74<br>-2.83, -0.70 | -2.02<br>-3.30, -0.77 |
| <b>CD+A vs. AL</b>        | -0.98<br>(-2.07, -0.01)                                                 | -1.25<br>(-2.24, -0.41) | -1.39<br>(-2.36, -0.56) | -1.53<br>-2.51, -0.68 | -1.82<br>-2.89, -0.82 | -2.10<br>-3.37, -0.88 |

**Table S3. Selected results for treatment success from the NMA model including interactions (*model S1*).**

AQ+AS: amodiaquine-artesunate; AL: artemether-lumefantrine; CD+A: chlorproguanil-dapsone plus artesunate; DHAPQ: dihydroartemisinin-piperaquine. The between trial variance was 0.77 (0.27, 2.07).

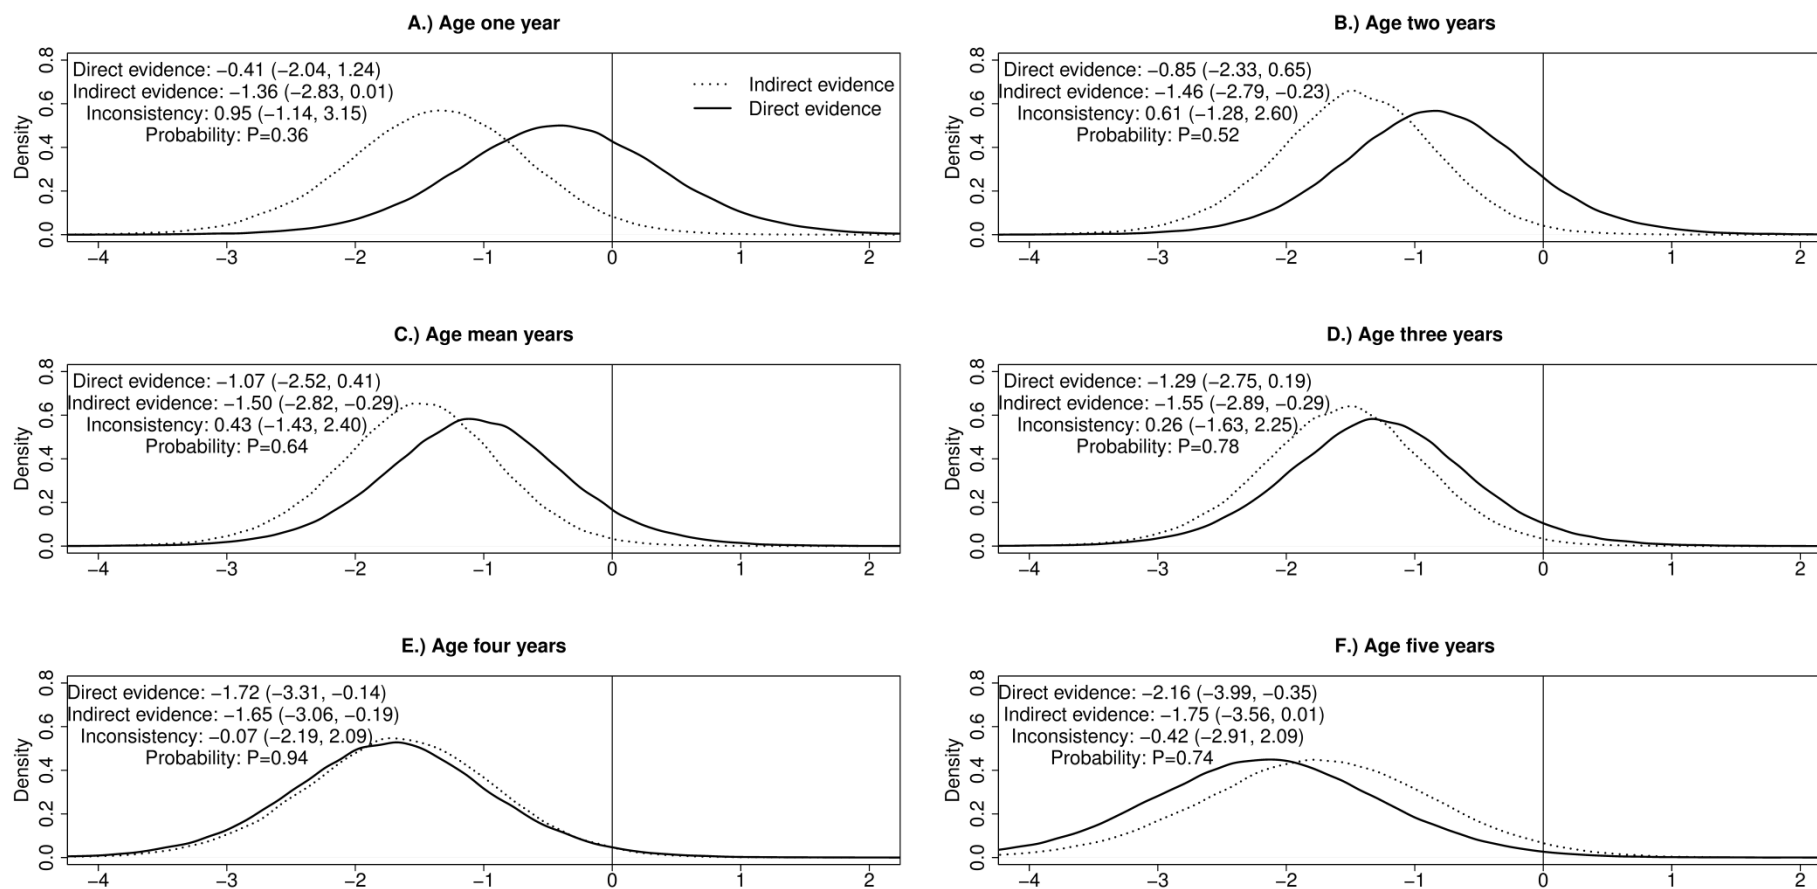

**Figure S1. Posterior distributions of log odds ratios at various ages for treatment success for CD+A versus AQ+AS.**

The mean age was 2.5 years.

AQ+AS: amodiaquine-artesunate; CD+A: chlorproguanil-dapsone plus artesunate.

Posterior median (95% credibility interval) presented.



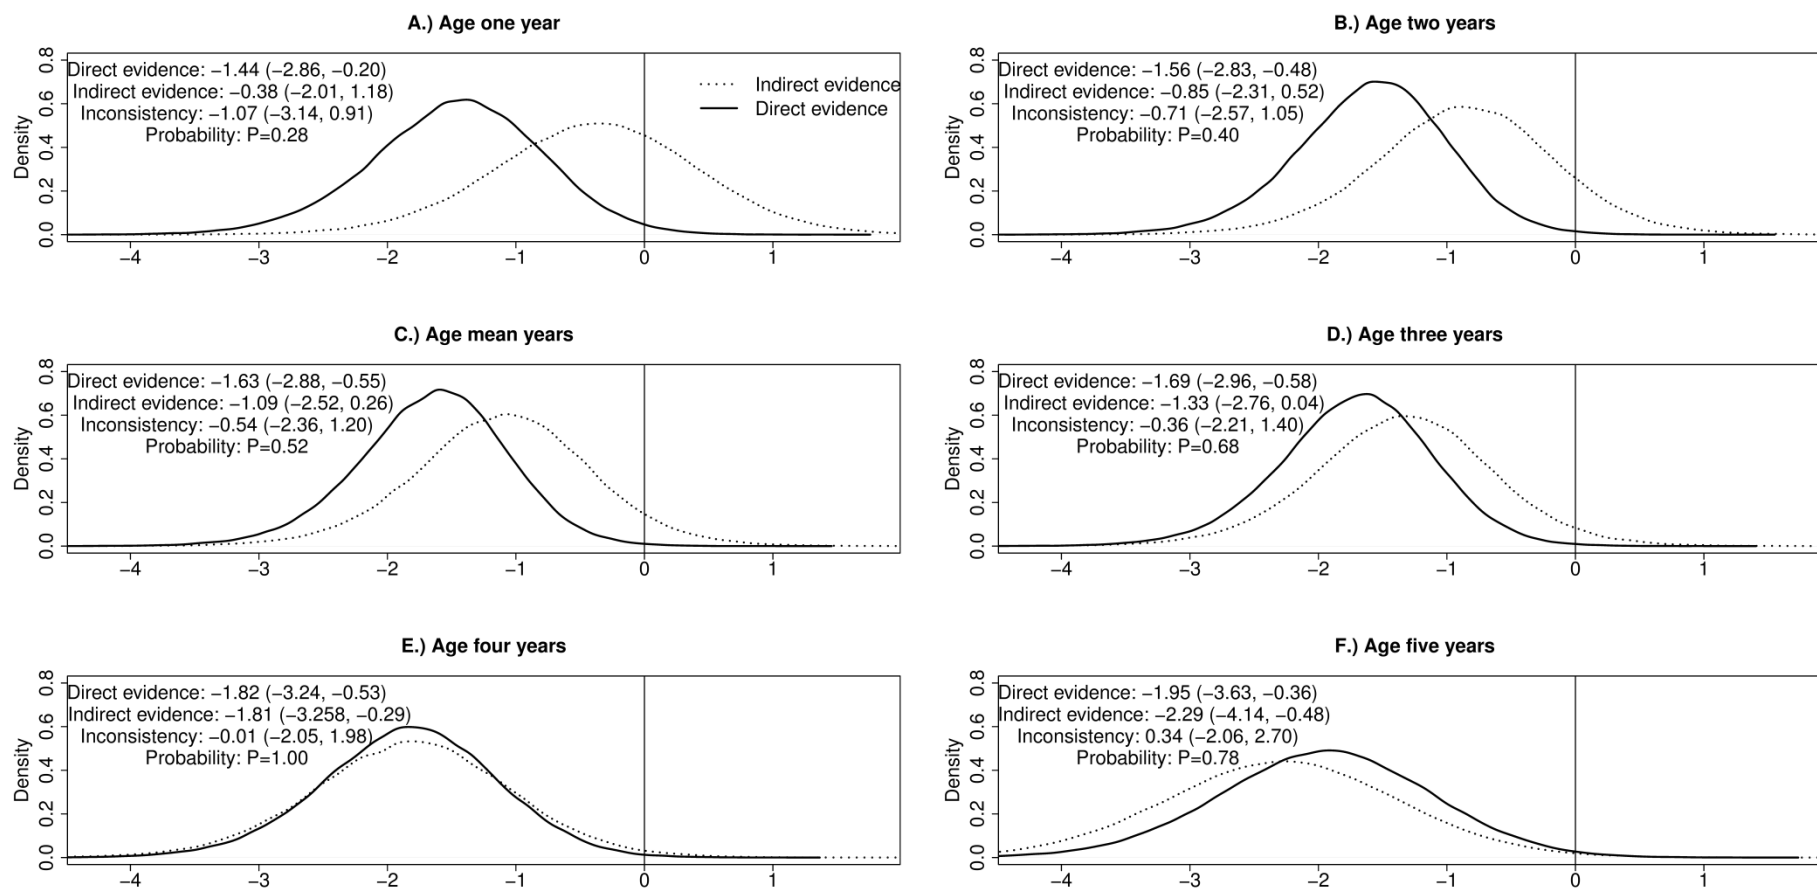

**Figure S2. Posterior distributions of log odds ratios at various ages for treatment success for CD+A versus AL.**

The mean age was 2.5 years.

AL: artemether-lumefantrine; CD+A: chlorproguanil-dapsone plus artesunate.

Posterior median (95% credibility interval) presented.
